# Supplementary material
Source: HighWire-hosted journal article supplement (http://www.jneurosci.org/highwire/filestream/601188/field_highwire_adjunct_files/2/Supplemental_Table.pdf)
Supplement: Supplemental_Table.pdf [file Supplemental_Table.pdf]

**Supplementary Table 1.** Recording conditions for individual fibers presented along with the EPSC rate, total number of EPSCs analyzed (monophasic + multiphasic EPSCs), the percentage of monophasic EPSCs, the median EPSC amplitude, and fiber classification. A fiber was classified as low (amplitude), if the median EPSC amplitude was < 250 pA, and it was classified as high (amplitude), if the median EPSC amplitude was > 250 pA. The table illustrates, that fiber type does not systematically vary with the extracellular potassium concentration used (as also shown in Figure 7).

| Fiber | age<br>(days) | extracellular<br>[K <sup>+</sup> ] mM | holding<br>voltage<br>(mV) | rate<br>(EPSCs/s) | Total<br>number<br>of<br>EPSCs | % of<br>monophasic<br>EPSCs | Median<br>EPSC<br>amplitude<br>(pA) | fiber<br>class |
|-------|---------------|---------------------------------------|----------------------------|-------------------|--------------------------------|-----------------------------|-------------------------------------|----------------|
| EY4   | 10            | 15                                    | -94                        | 18.4              | 815                            | 35                          | 108                                 | low            |
| EY8   | 9             | 15                                    | -94                        | 4.4               | 734                            | 46                          | 165                                 | low            |
| EY9   | 9             | 15                                    | -94                        | 1.5               | 211                            | 60                          | 97                                  | low            |
| EY12  | 10            | 5.8                                   | -94                        | 2.2               | 657                            | 78                          | 47                                  | low            |
| EY86  | 10            | 5.8                                   | -94                        | 0.6               | 860                            | 66                          | 187                                 | low            |
| EY91  | 11            | 5.8                                   | -94                        | 1.6               | 1230                           | 47                          | 157                                 | low            |
| EY96  | 9             | 5.8                                   | -94                        | 0.4               | 875                            | 56                          | 149                                 | low            |
| EY171 | 11            | 5.8                                   | -94                        | 0.2               | 174                            | 55                          | 19                                  | low            |
| EY173 | 11            | 5.8                                   | -94                        | 0.3               | 319                            | 46                          | 41                                  | low            |
| EG    | 11            | 15                                    | -94                        | 0.7               | 557                            | 37                          | 170                                 | low            |
| EY10  | 8             | 5.8                                   | -94                        | 1.3               | 391                            | 86                          | 212                                 | low            |
| EY7   | 11            | 15                                    | -94                        | 12.4              | 2466                           | 58                          | 251                                 | high           |

|       |    |     |     |      |      |    |     |      |
|-------|----|-----|-----|------|------|----|-----|------|
| LG17  | 19 | 5.8 | -94 | 0.7  | 435  | 55 | 157 | low  |
| LG40  | 20 | 5.8 | -84 | 0.06 | 69   | 66 | 97  | low  |
|       |    | 40  |     | 0.24 | 60   | 67 | 74  |      |
| LG41  | 20 | 5.8 | -84 | 0.4  | 203  | 68 | 110 | low  |
| LG22  | 21 | 5.8 | -84 | 0.7  | 118  | 84 | 284 | high |
| LG76  | 21 | 40  | -94 | 11.6 | 257  | 86 | 332 | high |
| LG80  | 19 | 5.8 | -94 | 16.9 | 641  | 84 | 309 | high |
| EYP21 | 21 | 40  | -94 | 29.3 | 816  | 70 | 414 | high |
| LG96  | 20 | 5.8 | -94 | 0.5  | 1556 | 75 | 344 | high |
|       |    | 40  |     | 3.3  | 263  | 88 | 319 |      |
| LG39  | 20 | 5.8 | -84 | 2.0  | 1401 | 87 | 473 | high |
| LG62  | 20 | 5.8 | -84 | 0.2  | 250  | 86 | 474 | high |
|       |    | 40  |     | 4.0  | 1684 | 93 | 469 |      |
| LG72  | 20 | 40  | -94 | 35.4 | 3230 | 79 | 349 | high |
| LG19  | 20 | 5.8 | -84 | 0.15 | 23   | 87 | 215 | *    |
| LG30  | 19 | 5.8 | -84 | 0.3  | 33   | 30 | 231 | *    |
| LG64  | 20 | 15  | -94 | 1.1  | 34   | 47 | 101 | *    |
| LG111 | 60 | 5.8 | -94 | 3.0  | 2683 | 74 | 255 | high |
| LG112 | 60 | 5.8 | -94 | 2.8  | 3481 | 52 | 300 | high |
|       |    | 40  |     | 2.9  | 812  | 32 | 237 |      |

\* too few EPSCs to classify fiber
